# Supplementary material
Source: publisher figshare collection journal article supplement (https://gsapubs.figshare.com/articles/dataset/_/23595735)
Supplement: Supplementary file 1 [file 1]

## Sheet: 1912-SM183
Sample number	latitude	longitude	Datum
1912-SM183	33.8797	-114.894	NAD1983
Real sample number	Duration(s)	238U/206Pb	2σ error 238U/206Pb	207Pb/206Pb	2σ error 207Pb/206Pb	Error Correlation 238U/206Pb vs. 207Pb/206Pb	U PPM	Exclusions for 207/206 >1	Exclusions for 207/206err >0.2
SM183_1.FIN2	8.7372	1.86567	0.090499	0.802	0.027	0.12354	0.817
SM183_2.FIN2	4.1424	5.55556	0.617284	0.801	0.034	-0.14437	1.253			Age for entire sample (Excluding high Pb0 and large ellipse uncertainty analyses)		2σ uncertainty		Age for spot run		2σ uncertainty
SM183_3.FIN2	2.8931	2.77778	0.308642	0.767	0.046	0.19514	0.67			Age	6.8	2.92		Age	11.02	6.22
SM183_3.FIN2	5.5038	16.3666	1.58041	0.774	0.067	0.55874	1.137			Pb0 =	0.7918	0.0028		Pb0 =	0.815
SM183_4.FIN2	8.509	25.7069	2.51122	0.759	0.052	0.24955	0.86			MSWD =	1.5			MSWD =	0.96
SM183_4.FIN2	7.5459	45.6621	4.37856	0.771	0.059	0.41073	2.065			n =	174			n =	15
SM183_5.FIN2	4.4247	47.8469	4.80758	0.736	0.075	0.62276	1.476			mean U (ppm) =	2.3
SM183_5.FIN2	6.3547	3.18471	0.131851	0.846	0.039	0.2968	0.51
SM183_7.FIN2	6.2966	6.71141	0.495473	0.829	0.046	0.090346	0.346
SM183_7.FIN2	1.8509	6.94444	1.06096	0.78	0.15	-0.12111	0.47
SM183_8.FIN2	5.6159	4.42478	0.469888	0.82	0.13	0.63726	0.0702
SM183_8.FIN2	7.5459	64.5161	5.41103	0.739	0.054	0.5386	2.46
SM183_9.FIN2	5.8442	17.5131	1.96294	0.788	0.058	0.39551	1.202
SM183_10.FIN2	9.1897	12.1951	1.48721	0.797	0.08	0.44066	0.523
SM183_10.FIN2	4.4827	0.88574	0.0627628	0.855	0.058	0.79629	3.497
SM183_12.FIN2	7.1475	0.8726	0.0296958	0.804	0.018	0.11108	2.1							Age for spot run		2σ uncertainty
SM183_12.FIN2	4.3125	0.95057	0.0524079	0.805	0.042	0.5545	4.43							Age	88.9	72.2
SM183_13.FIN2	6.8072	1.28535	0.0313902	0.796	0.017	0.36738	2.61							Pb0 =	0.807
SM183_13.FIN2	4.6529	1.21065	0.0762155	0.766	0.042	0.60833	5.28							MSWD =	0.52
SM183_14.FIN2	9.0195	1.65289	0.0464449	0.805	0.022	0.41263	2.82							n =	18
SM183_14.FIN2	4.9933	1.0917	0.0667417	0.792	0.034	0.52662	6.1
SM183_15.FIN2	6.9774	1.79856	0.119688	0.784	0.018	0.2565	1.99
SM183_15.FIN2	4.8231	0.97371	0.0739526	0.793	0.017	0.095412	4.95
SM183_16.FIN2	6.637	1.40647	0.0573666	0.804	0.022	0.50635	1.33
SM183_16.FIN2	5.5038	0.832639	0.0478369	0.797	0.025	0.44623	5.58
SM183_17.FIN2	6.637	1.56986	0.108436	0.79	0.019	0.35686	1.72
SM183_17.FIN2	5.1634	2.25225	0.162325	0.783	0.037	0.28646	8.82
SM183_18.FIN2	7.3177	2.55755	0.156985	0.778	0.014	0.12083	2.22
SM183_18.FIN2	3.2915	0.724638	0.05251	0.803	0.033	0.25365	5.96
SM183_19.FIN2	6.2966	0.807102	0.0384335	0.789	0.015	0.31772	1.44
SM183_19.FIN2	3.6318	1.18064	0.101755	0.817	0.08	0.80317	4.72
SM183_20.FIN2	5.6159	0.81367	0.0291306	0.8	0.019	0.15462	4.49
SM183_20.FIN2	4.1424	0.714286	0.0612245	0.81	0.036	-0.014838	4.44
SM183_21.FIN2	8.6792	2.15054	0.434732	0.787	0.016	0.06994	3.04							Age for spot run		2σ uncertainty
SM183_21.FIN2	4.1414	1.21507	0.0797249	0.797	0.043	0.37168	4.91							Age	25.5	68.6
SM183_22.FIN2	8.509	1.77936	0.107648	0.786	0.017	-0.010475	2.85							Pb0 =	0.7944
SM183_22.FIN2	4.4827	0.766871	0.0423426	0.785	0.02	0.25143	2.61							MSWD =	1.1
SM183_23.FIN2	6.4668	0.651466	0.0292841	0.794	0.02	0.42172	0.382							n =	22
SM183_23.FIN2	5.8442	0.189394	0.0279787	0.792	0.042	0.32235	0.048
SM183_24.FIN2	1.7588	0.578035	0.0801898	0.821	0.05	0.38212	0.233
SM183_26.FIN2	7.4879	0.446429	0.0279018	0.781	0.028	0.30772	0.0653
SM183_26.FIN2	7.2056	0.244499	0.0221185	0.798	0.033	-0.034401	0.057
SM183_27.FIN2	5.5038	0.199601	0.0342628	0.789	0.039	0.028048	0.039
SM183_29.FIN2	5.8442	0.668896	0.0241608	0.781	0.014	0.37963	1.89
SM183_30.FIN2	4.9352	0.833333	0.0458333	0.799	0.024	0.37103	0.43
SM183_30.FIN2	9.7583	0.597372	0.0181995	0.794	0.013	0.43395	1.31
SM183_31.FIN2	6.8652	0.398406	0.0349201	0.849	0.04	0.39022	0.06
SM183_32.FIN2	2.7018	1.0917	0.090578	0.784	0.018	0.43807	3.77
SM183_33.FIN2	7.5459	0.369004	0.029956	0.826	0.042	-0.1219	0.0258
SM183_35.FIN2	1.3614	0.704225	0.123983	0.778	0.089	0.16117	0.056
SM183_37.FIN2	1.93	0.395257	0.0765517	0.76	0.13	0.20739	0.0153
SM183_37.FIN2	1.5897	0.478469	0.112177	0.83	0.13	0.59725	0.048
SM183_40.FIN2	6.8642	0.46729	0.0414883	0.83	0.049	0.25407	0.0438
SM183_41.FIN2	2.1913	0.487805	0.109459	0.758	0.075	0.47375	0.079
SM183_42.FIN2	5.8072	2.94118	0.242214	0.804	0.031	0.13924	1.32
SM183_44.FIN2	1.5527	1.06952	0.0720638	0.804	0.022	0.054241	0.88							Age for spot run		2σ uncertainty
SM183_45.FIN2	2.8931	0.490196	0.0288351	0.78	0.053	0.40322	0.1129							Age	16	95.8
SM183_45.FIN2	1	0.207039	0.0137169	0.804	0.062	0.0079187	0.227							Pb0 =	0.807
SM183_46.FIN2	5.1054	0.625	0.117188	0.864	0.045	0.07373	0.265							MSWD =	0.85
SM183_46.FIN2	3.8561	1.44092	0.0747452	0.794	0.025	0.29883	2.06							n =	14
SM183_47.FIN2	4.6529	0.740741	0.0493827	0.804	0.042	0.28723	0.803
SM183_48.FIN2	6.8072	3.04878	0.269557	0.808	0.022	0.18122	1.38
SM183_49.FIN2	1.8509	2.46914	0.121933	0.789	0.041	0.70983	1.8
SM183_49.FIN2	5.7861	1.14417	0.0772377	0.815	0.039	0.087966	0.144
SM183_50.FIN2	1.8509	1.5949	0.160253	0.815	0.077	0.28684	0.26
SM183_50.FIN2	5.1634	1.24688	0.150808	0.812	0.08	0.56905	0.0642
SM183_52.FIN2	3.3825	0.948767	0.073813	0.794	0.046	0.78134	0.47
SM183_53.FIN2	2.5316	1.9685	0.10075	0.782	0.055	0.40101	0.502
SM183_53.FIN2	3.5738	2.5641	0.151216	0.803	0.045	0.34705	0.208
SM183_54.FIN2	1.6807	3.84615	2.07101	1.03	0.39	0.597	0.032	X	X					Age for spot run		2σ uncertainty
SM183_55.FIN2	2.2704	6.0241	1.48788	0.85	0.11	0.76804	0.47							Age	no fit
SM183_55.FIN2	3.0632	4.31034	0.650267	0.82	0.13	0.73491	0.0361							Pb0 =
SM183_56.FIN2	3.8931	12.7388	0.762708	0.79	0.044	0.38971	1.779							MSWD =
SM183_56.FIN2	4.5948	13.2275	1.0673	0.799	0.077	0.50121	0.73							n =	12
SM183_57.FIN2	3.802	8.69565	1.13422	0.838	0.083	0.63128	1.05
SM183_57.FIN2	5.2756	7.5188	0.73492	0.828	0.079	0.68489	0.261
SM183_58.FIN2	4.1424	12.9702	1.27851	0.85	0.1	0.70452	0.757
SM183_58.FIN2	3.9141	9.17431	0.84168	0.787	0.087	-0.0103	0.24
SM183_59.FIN2	8.567	11.0865	1.06932	0.855	0.081	0.56593	0.296
SM183_60.FIN2	2.0422	3.861	0.447221	0.87	0.1	0.61475	0.94
SM183_60.FIN2	6.695	2.47525	0.159298	0.793	0.043	0.33587	0.33
SM183_61.FIN2	5.5948	4.56621	0.875711	0.76	0.13	0.8223	0.123
SM183_62.FIN2	1.5316	2.63158	1.45429	0.95	0.39	0.59257	0.17	X	X
SM183_64.FIN2	2.9511	2.87356	0.322037	0.766	0.03	0.21404	4.12							Age for spot run		2σ uncertainty
SM183_64.FIN2	4.4247	4.65333	0.197046	0.815	0.03	0.47451	1.19							Age	17.1	26.4
SM183_65.FIN2	8.4879	5.1948	0.25097	0.79	0.022	0.39522	1.52							Pb0 =	0.7844
SM183_66.FIN2	7.8863	7.59301	0.403577	0.786	0.028	0.19627	1.37							MSWD =	2.6
SM183_67.FIN2	3.2915	3.61011	0.286723	0.802	0.027	0.41171	7.73							n =	18
SM183_67.FIN2	4.5948	5.07614	0.46381	0.798	0.022	0.50012	3.68
SM183_68.FIN2	4.3125	6.36943	0.446266	0.757	0.025	0.41195	11.5
SM183_68.FIN2	4.765	5.43478	0.856569	0.744	0.038	0.39319	1.99
SM183_69.FIN2	2.4406	3.80228	0.375891	0.764	0.035	0.28551	8.6
SM183_69.FIN2	5.2756	3.78788	0.416093	0.752	0.017	-0.025526	3.25
SM183_70.FIN2	2.8931	1.7301	0.116737	0.809	0.052	0.10694	1.55
SM183_70.FIN2	4.9352	1.10011	0.079876	0.756	0.04	0.49569	0.221
SM183_71.FIN2	2.7229	5.84795	0.512978	0.726	0.049	0.41908	9.9
SM183_71.FIN2	6.9774	10.4932	0.957929	0.751	0.023	0.33638	4.32
SM183_72.FIN2	2.3825	5.81395	0.946457	0.764	0.036	-0.029062	8.4
SM183_72.FIN2	5.1634	9.4697	0.573921	0.787	0.033	0.24771	2.25
SM183_73.FIN2	3.2915	6.25	0.664062	0.756	0.031	0.073045	7.4
SM183_73.FIN2	5.1054	4.83092	0.233378	0.774	0.037	0.32044	1.53
SM183_74.FIN2	4.0263	6.36943	1.09538	0.8	0.16	0.47989	0.39							Age for spot run		2σ uncertainty
SM183_75.FIN2	5.2545	10.7643	0.799499	0.773	0.053	0.66743	0.93							Age	5.2	27.8
SM183_75.FIN2	4.765	8.69565	1.0586	0.78	0.13	0.77518	0.184							Pb0 =	0.789
SM183_76.FIN2	7.0354	11.3379	0.874121	0.733	0.057	0.4586	0.351							MSWD =	0.77
SM183_77.FIN2	1.1913	8.13008	2.51173	0.82	0.12	0.32903	1.57							n =	16
SM183_77.FIN2	6.1845	0.671141	0.0495473	0.786	0.021	0.3559	0.193
SM183_78.FIN2	7.8863	3.67647	0.540657	0.94	0.21	0.92704	0.0387	X	X
SM183_79.FIN2	2.4396	6.94444	1.63966	0.79	0.11	0.73989	0.62
SM183_79.FIN2	5.6159	8.13008	1.38806	0.84	0.15	0.65079	0.083
SM183_80.FIN2	2.6107	14.4927	2.31044	0.786	0.079	-0.0098895	0.52
SM183_80.FIN2	5.4457	11.7647	1.6609	0.77	0.12	0.80332	0.192
SM183_81.FIN2	3.802	10.7527	1.1562	0.78	0.1	0.70286	0.82
SM183_81.FIN2	4.2545	12.7877	1.5535	0.83	0.13	0.76673	0.223
SM183_82.FIN2	2.7229	7.57576	1.54959	0.741	0.085	0.31688	1.05
SM183_82.FIN2	5.5038	7.93651	1.00781	0.89	0.13	0.27908	0.156
SM183_83.FIN2	1.7018	8.33333	1.18056	0.817	0.096	0.42624	1.13
SM183_83.FIN2	6.8652	8.69565	0.756144	0.843	0.087	0.15083	0.197
SM183_84.FIN2	7.3758	50	4.25	0.703	0.052	0.27714	3.69							Age for spot run		2σ uncertainty
SM183_84.FIN2	6.8072	31.9489	3.47049	0.823	0.065	0.32049	1.13							Age	19.61	9.24
SM183_85.FIN2	6.5249	44.843	9.45123	0.768	0.055	0.27204	3.58							Pb0 =	0.864
SM183_85.FIN2	8.6792	53.1915	4.80987	0.709	0.075	0.83285	1.42							MSWD =	1
SM183_86.FIN2	6.5249	51.5464	3.18844	0.761	0.055	0.71985	3.08							n =	19
SM183_86.FIN2	9.3599	44.4444	2.96296	0.803	0.079	0.92056	1.59
SM183_87.FIN2	3.802	43.8597	3.27024	0.745	0.052	0.063821	2.85
SM183_87.FIN2	7.9984	33.7838	3.19576	0.821	0.08	0.52174	1.03
SM183_88.FIN2	2.4406	18.1488	2.6021	0.75	0.068	0.24192	1.41
SM183_88.FIN2	7.8283	31.0559	2.70051	0.789	0.067	0.57292	0.782
SM183_89.FIN2	7.5449	27.1003	3.23147	0.789	0.043	0.41223	1.904
SM183_89.FIN2	6.9774	21.5983	2.14583	0.91	0.1	0.35437	0.817
SM183_90.FIN2	6.637	32.7869	3.86993	0.751	0.078	0.66276	0.87
SM183_90.FIN2	8.8493	15.6986	1.62654	0.804	0.072	0.61495	0.36
SM183_91.FIN2	6.2966	38.3142	4.25713	0.725	0.082	0.56165	1.208
SM183_91.FIN2	9.1897	20.3666	2.03251	0.815	0.091	0.70769	0.61
SM183_92.FIN2	4.8231	23.31	2.06476	0.82	0.11	0.69728	0.99
SM183_92.FIN2	11.062	14.1844	1.34802	0.8	0.066	0.27937	0.676
SM183_93.FIN2	8.0565	16.4745	1.13991	0.854	0.071	0.79903	0.601
SM183_94.FIN2	3.4616	3.92157	0.184544	0.775	0.032	0.60245	5.157							Age for spot run		2σ uncertainty
SM183_94.FIN2	5.4457	3.83142	0.190837	0.769	0.024	0.387	5.42							Age	33.6	54.8
SM183_95.FIN2	5.5038	4.04695	0.094991	0.786	0.019	0.44426	12.27							Pb0 =	0.7935
SM183_95.FIN2	4.0843	3.81679	0.233087	0.785	0.03	-0.0080062	7							MSWD =	1.7
SM183_96.FIN2	8.3968	2.49377	0.11194	0.794	0.025	0.20905	11.09							n =	19
SM183_96.FIN2	8.509	3.48432	0.145686	0.781	0.035	0.66851	2.44
SM183_97.FIN2	3.802	0.724638	0.099769	0.824	0.042	0.098176	0.146
SM183_98.FIN2	7.2056	1.89394	0.0717401	0.768	0.034	0.65801	9.09
SM183_98.FIN2	9.0195	2.82486	0.215455	0.754	0.034	0.39756	3.77
SM183_99.FIN2	5.673	2.20264	0.121291	0.774	0.029	0.62445	3.3
SM183_99.FIN2	5.7861	3.4965	0.232285	0.791	0.054	0.3033	3.08
SM183_100.FIN2	3.5738	1.3986	0.121277	0.769	0.019	0.20909	10.61
SM183_100.FIN2	7.3177	1.91939	0.110521	0.777	0.014	-0.00075538	9.57
SM183_100.FIN2	5.1054	3.62319	0.196912	0.762	0.034	0.44649	1.52
SM183_102.FIN2	4.2545	1.78891	0.131208	0.783	0.057	0.67757	8.33
SM183_102.FIN2	5.9563	2.68097	0.222815	0.8	0.028	0.04713	8.81
SM183_102.FIN2	4.9352	3.81679	0.233087	0.779	0.03	0.34648	1.69
SM183_103.FIN2	3.9722	1.12613	0.0722851	0.845	0.051	0.58969	1.77
SM183_103.FIN2	6.2966	2.09205	0.21008	0.815	0.022	0.055874	1.9
SM183_104.FIN2	5.3336	7.54717	0.427198	0.821	0.043	0.5226	2.73							Age for spot run		2σ uncertainty
SM183_104.FIN2	10.891	5.88235	0.262976	0.769	0.022	0.39327	1.88							Age	2.9	10.02
SM183_105.FIN2	4.3125	2.61097	0.252234	0.78	0.028	-0.023579	2.83							Pb0 =	0.787
SM183_105.FIN2	11.062	6.13497	0.564568	0.783	0.027	0.2522	2.002							MSWD =	1.6
SM183_107.FIN2	8.3968	23.6407	1.50898	0.74	0.039	0.59273	2.732							n =	21
SM183_107.FIN2	8.509	22.0264	1.79511	0.776	0.046	0.7003	2.46
SM183_108.FIN2	3.6318	15.4799	1.29398	0.785	0.065	0.65669	3.08
SM183_108.FIN2	4.9352	14.3472	1.00863	0.834	0.039	0.64898	2.35
SM183_108.FIN2	7.8283	6.20347	0.315561	0.772	0.018	0.35885	1.98
SM183_109.FIN2	6.1845	3.67647	0.175714	0.808	0.043	0.68122	3.002
SM183_109.FIN2	5.1054	3.663	0.308605	0.776	0.033	0.16972	2.612
SM183_109.FIN2	6.1265	4.11523	0.237091	0.767	0.032	0.62082	1.02
SM183_110.FIN2	7.0344	5.49451	0.452844	0.843	0.061	0.73194	2.046
SM183_110.FIN2	7.3177	7.19424	0.336421	0.808	0.039	0.77247	2.118
SM183_110.FIN2	3.7439	7.98085	0.369425	0.791	0.037	0.79452	1.31
SM183_111.FIN2	6.8652	8.8574	0.627628	0.79	0.056	0.6199	1.51
SM183_111.FIN2	11.742	10.2145	0.626017	0.788	0.031	0.41346	1.41
SM183_112.FIN2	9.5881	16.4474	0.892703	0.821	0.045	0.58825	1.506
SM183_112.FIN2	4.9352	14.4718	1.31942	0.766	0.04	0.46648	1.42
SM183_113.FIN2	6.8652	16.0772	0.956359	0.784	0.043	0.68934	1.476
SM183_113.FIN2	8.509	16.6667	1	0.777	0.037	0.27648	1.83

## Sheet: 1912-SM184
Sample number	latitude	longitude	Datum						Mavor, S.P., Bennett, S.E.K., Crow, R.S., Singleton, J.S., Langenheim, V., Stockli, D., Stelten, M., Brickey, T.A., Sr., Umhoefer, P.J., and Beard, L.S., 2023, Evolution of Miocene normal and dextral faulting in the lower Colorado River region near Blythe, California, USA: Geosphere, v. 19, https://doi.org/10.1130/GES02608.1.
1912-SM184	33.8798	-114.894	NAD1983 UTM zone 11N
Real sample number	Duration(s)	238U/206Pb	2σ error 238U/206Pb	207Pb/206Pb	2σ error 207Pb/206Pb	Error Correlation 238U/206Pb vs. 207Pb/206Pb	U PPM	Exclusions for 207/206 >1	Exclusions for 207/206err >0.2
SM184_1.FIN2	3.8562	7.22543	0.203607	0.805	0.021	0.41644	4.129			Age for entire sample (Excluding high Pb0 and large ellipse uncertainty analyses)		2σ uncertainty		Age for spot run		2σ uncertainty
SM184_1.FIN2	3.9141	5.14403	0.193166	0.833	0.031	-0.31735	2.23			Age	9.94	0.72		Age	11.02	6.22
SM184_2.FIN2	4.9352	1.79211	0.0642335	0.804	0.022	0.57054	1.473			Pb0 =	0.8088	0.0034		Pb0 =	0.815
SM184_2.FIN2	2.6097	1.44509	0.0563834	0.789	0.028	0.41253	1.329			MSWD =	1.6			MSWD =	0.96
SM184_3.FIN2	5.8442	0.556173	0.0231997	0.805	0.02	0.60625	0.41			n =	153			n =	17
SM184_3.FIN2	1.3614	0.869565	0.15879	0.822	0.084	0.58639	0.49			Mean U (ppm) =	4.6
SM184_4.FIN2	9.5881	9.30233	0.33748	0.803	0.022	0.29709	2.48
SM184_5.FIN2	8.3968	4.10004	0.0924568	0.795	0.019	0.4681	3.384			Age for T-fracture spots 1-20, 31-40, and 51-57 (Excluding high Pb0 and large ellipse uncertainty analyses)		2σ uncertainty
SM184_6.FIN2	6.3547	7.59878	0.20787	0.817	0.023	0.45985	5.189			Age	9.77	0.78
SM184_7.FIN2	3.4606	3.34448	0.134227	0.809	0.025	0.63591	2.223			Pb0 =	0.8093	0.0042
SM184_7.FIN2	3.9141	2.07039	0.150029	0.821	0.023	0.37083	1.555			MSWD =	1.4
SM184_8.FIN2	4.9933	1.00604	0.0404844	0.825	0.029	0.73564	0.705			n =	72
SM184_8.FIN2	3.4036	0.783085	0.038633	0.819	0.027	0.48551	0.581			Mean U (ppm) =	7.9
SM184_9.FIN2	1.7598	0.543478	0.0354442	0.838	0.024	0.22691	0.432
SM184_9.FIN2	5.2756	0.651042	0.0313653	0.811	0.021	0.53197	0.542			Age for matrix spots 21-30 and 41-50 (nothing excluded)		2σ uncertainty
SM184_10.FIN2	2.7809	0.245098	0.0186227	0.785	0.021	0.029913	0.158			Age	9.66	7.94
SM184_10.FIN2	3.7439	0.440529	0.0407537	0.797	0.026	0.42481	0.265			Pb0 =	0.7979	0.016
SM184_11.FIN2	1.5105	1.69491	0.775639	1.05	0.19	-0.31356	4.54	X	X	MSWD =	0.94			Age for spot run		2σ uncertainty
SM184_11.FIN2	4.6519	5.77367	0.280016	0.815	0.027	0.59382	4.85			n =	35			Age	15.3	8.02
SM184_11.FIN2	1.872	4	0.176	0.806	0.013	0.2226	3.43			Mean U (ppm) =	3.9			Pb0 =	0.8123
SM184_12.FIN2	6.1845	13.6799	0.486563	0.793	0.022	0.56848	7.91							MSWD =	1.2
SM184_12.FIN2	6.4668	17.3913	0.695652	0.81	0.025	0.5859	3.85							n =	16
SM184_13.FIN2	8.2267	11.4942	0.317083	0.792	0.014	0.19727	9.39
SM184_13.FIN2	6.8072	9.67118	0.467659	0.797	0.034	0.46132	1.9
SM184_14.FIN2	7.5459	11.655	0.393934	0.797	0.019	0.22318	8.83
SM184_14.FIN2	6.8072	16.9491	0.689457	0.767	0.034	-0.080527	2.89
SM184_15.FIN2	8.7362	1.19904	0.0460064	0.823	0.025	0.6169	0.823
SM184_16.FIN2	6.1845	0.858369	0.0604174	0.796	0.03	0.014595	0.451
SM184_17.FIN2	3.1213	17.2712	0.715903	0.756	0.03	0.46731	12.99
SM184_17.FIN2	4.0843	12.5786	0.474665	0.772	0.023	0.4553	9.1
SM184_17.FIN2	3.5738	12.5945	0.380689	0.771	0.028	0.53438	3.73
SM184_18.FIN2	7.2056	1.25786	0.0537953	0.798	0.033	0.44888	0.484
SM184_19.FIN2	7.2046	0.533618	0.0216409	0.814	0.02	0.39843	0.471
SM184_20.FIN2	7.8863	0.787402	0.02604	0.804	0.021	0.36087	0.607
SM184_21.FIN2	4.8231	24.8139	1.35461	0.762	0.037	0.17708	6.37							Age for spot run		2σ uncertainty
SM184_21.FIN2	3.0632	21.0084	1.14752	0.798	0.038	0.56813	3.94							Age	9.67	13.58
SM184_21.FIN2	2.5527	19.1571	1.94507	0.848	0.059	-0.011957	1.032							Pb0 =	0.798
SM184_22.FIN2	6.1845	14.7711	0.327276	0.771	0.017	0.60507	5.23							MSWD =	0.89
SM184_22.FIN2	6.8072	13.1926	0.609158	0.793	0.038	0.47879	2.15							n =	22
SM184_23.FIN2	6.8652	22.4215	0.955177	0.786	0.028	0.54289	5.28
SM184_23.FIN2	5.9563	21.3675	1.50668	0.759	0.057	0.70687	1.44
SM184_24.FIN2	7.5459	17.0068	0.46277	0.774	0.022	0.56686	5.86
SM184_24.FIN2	4.765	17.2117	0.740607	0.783	0.043	0.39514	2.08
SM184_25.FIN2	6.5249	21.645	1.12442	0.772	0.033	0.35361	6.21
SM184_25.FIN2	5.7861	23.6407	1.62075	0.749	0.045	0.026739	1.81
SM184_26.FIN2	5.674	28.8184	1.82711	0.753	0.028	0.49879	8.25
SM184_26.FIN2	5.2756	22.6757	0.92554	0.766	0.044	0.50658	2.76
SM184_27.FIN2	4.3125	22.173	1.32743	0.799	0.054	0.72696	5.23
SM184_27.FIN2	4.765	20.9205	0.744035	0.787	0.034	0.55595	5.01
SM184_27.FIN2	2.7229	27.4725	2.0378	0.736	0.053	0.69028	1.95
SM184_28.FIN2	5.674	12.9032	0.782518	0.764	0.039	0.60981	6.16
SM184_28.FIN2	6.2966	14.1044	0.676373	0.788	0.032	0.38421	2.72
SM184_29.FIN2	5.8442	20.7039	1.37169	0.802	0.051	0.77843	5.27
SM184_29.FIN2	7.1475	25.1256	1.38885	0.78	0.038	0.30516	3.13
SM184_30.FIN2	6.0143	18.1818	0.892562	0.769	0.045	0.72519	4.96
SM184_30.FIN2	5.6159	24.2131	1.70019	0.771	0.048	0.69102	1.87
SM184_31.FIN2	6.0143	101.523	4.94731	0.707	0.032	0.21709	23.95							Age for spot run		2σ uncertainty
SM184_31.FIN2	7.8283	95.2381	10.8843	0.688	0.061	0.10682	4.33							Age	9.32	1.4
SM184_32.FIN2	4.6519	108.814	5.32821	0.696	0.028	0.024632	26.5							Pb0 =	0.8059
SM184_32.FIN2	7.8283	136.799	9.16983	0.668	0.045	0.60709	7.44							MSWD =	1.5
SM184_33.FIN2	5.5038	104.493	5.02266	0.684	0.035	0.5546	24.29							n =	26
SM184_33.FIN2	9.0195	136.426	8.74762	0.697	0.053	0.50698	6.27
SM184_34.FIN2	6.1845	160	7.68	0.587	0.032	0.51466	35.27
SM184_34.FIN2	7.9984	198.02	11.3714	0.61	0.045	0.60489	12.4
SM184_35.FIN2	3.4616	111.982	6.77159	0.684	0.038	0.46552	16.6
SM184_35.FIN2	5.7861	110.375	5.72587	0.699	0.029	0.5818	9.9
SM184_36.FIN2	3.1213	71.4286	6.63265	0.705	0.046	0.35524	18.06
SM184_36.FIN2	5.2756	142.653	9.97149	0.655	0.041	0.15788	20.5
SM184_36.FIN2	2.7229	218.341	23.3596	0.625	0.083	0.63439	15.81
SM184_36.FIN2	4.765	17.5439	3.69344	0.828	0.029	0.02892	8.4
SM184_37.FIN2	3.4616	52.9381	2.26998	0.73	0.036	0.65741	13.61
SM184_37.FIN2	3.7439	63.6943	5.27405	0.722	0.035	0.52088	10.45
SM184_37.FIN2	2.0422	82.6446	8.19616	0.745	0.069	0.64758	8
SM184_37.FIN2	2.7229	15.3846	2.60355	0.818	0.045	0.15739	3.7
SM184_38.FIN2	4.6529	61.5006	3.59321	0.719	0.031	0.24538	16.3
SM184_38.FIN2	6.9774	54.1712	2.67041	0.741	0.044	0.62445	5.49
SM184_39.FIN2	5.1634	65.1042	3.30607	0.701	0.039	0.56522	19.05
SM184_39.FIN2	4.765	70.922	6.53891	0.741	0.065	0.59125	8.5
SM184_39.FIN2	4.5948	45.4545	3.5124	0.691	0.051	0.44884	2.89
SM184_40.FIN2	4.8231	48.1464	2.08627	0.756	0.025	0.31784	14.58
SM184_40.FIN2	4.4247	40.6504	2.14819	0.743	0.042	0.29355	8.69
SM184_40.FIN2	5.4457	39.0625	3.35693	0.737	0.043	0.14983	3.48
SM184_41.FIN2	4.1424	8.45308	0.400146	0.827	0.049	0.34414	4.81							Age for spot run		2σ uncertainty
SM184_41.FIN2	2.8931	10.3734	0.64565	0.781	0.044	0.66326	2.8							Age	no fit
SM184_42.FIN2	5.674	9.5511	0.42875	0.769	0.031	0.47082	4.394							Pb0 =
SM184_42.FIN2	5.9563	9.56938	0.650168	0.823	0.068	0.80856	0.83							MSWD =
SM184_43.FIN2	5.1624	8.99281	0.372005	0.787	0.023	0.22636	4.75							n =	13
SM184_43.FIN2	6.8072	9.27644	0.619577	0.758	0.057	0.62605	0.88
SM184_44.FIN2	6.0143	8.56898	0.440565	0.742	0.048	0.78725	4.41
SM184_45.FIN2	4.4827	10.1626	0.351147	0.792	0.033	0.63577	5.29
SM184_46.FIN2	6.0143	8.38223	0.274021	0.786	0.027	0.53861	4.27
SM184_47.FIN2	6.5249	9.25926	0.471536	0.813	0.036	0.64086	3.75
SM184_48.FIN2	5.1634	9.48767	0.576101	0.815	0.053	0.63139	3.88
SM184_49.FIN2	6.0133	7.59301	0.340158	0.79	0.033	0.74672	3.63
SM184_50.FIN2	5.5038	7.94281	0.340677	0.779	0.029	0.72628	3.65
SM184_51.FIN2	6.3547	34.8432	1.82107	0.764	0.04	0.63287	4.79							Age for spot run		2σ uncertainty
SM184_52.FIN2	8.567	63.2911	4.80692	0.697	0.044	0.33037	10.18							Age	11.36	4.06
SM184_52.FIN2	5.9563	58.4795	4.7878	0.75	0.052	0.75726	3.81							Pb0 =	0.818
SM184_53.FIN2	7.5459	79.3651	4.97606	0.679	0.038	0.44719	14.03							MSWD =	1.3
SM184_53.FIN2	7.4879	69.5894	4.60055	0.769	0.061	0.46663	3.16							n =	13
SM184_54.FIN2	7.3758	60.6061	3.67309	0.712	0.041	0.73289	13.33
SM184_54.FIN2	7.3177	70.9723	3.52595	0.76	0.043	0.54335	4.97
SM184_55.FIN2	5.3326	134.953	10.1989	0.61	0.046	0.77153	26.1
SM184_55.FIN2	5.7861	116.55	6.52029	0.693	0.046	0.529	7.7
SM184_56.FIN2	6.5249	60.241	4.35477	0.718	0.047	0.56658	13.04
SM184_56.FIN2	7.6581	66.357	4.31519	0.747	0.048	0.75325	3.3
SM184_57.FIN2	6.1845	50.2513	2.77771	0.771	0.057	0.53952	13
SM184_57.FIN2	4.2545	85.8369	4.78918	0.696	0.042	0.38683	6.12
SM184_58.FIN2	17.076	0.134048	0.00772664	0.856	0.023	0.16101	0.043							Age for spot run		2σ uncertainty
SM184_59.FIN2	2.7229	2.43902	0.654372	0.86	0.21	0.8025	0.0231		X					Age	3.68	50.14
SM184_59.FIN2	17.075	0.222222	0.054321	0.853	0.069	0.68605	0.04							Pb0 =	0.856
SM184_60.FIN2	3.4036	2.43902	0.654372	0.97	0.36	0.86079	0.032		X					MSWD =	1.4
SM184_60.FIN2	17.076	0.217391	0.0519849	0.88	0.1	0.82266	0.053							n =	17
SM184_61.FIN2	1	5.71429	0.587755	0.66	0.16	0.14351	0.188
SM184_61.FIN2	5.4457	10.3093	1.80678	0.91	0.23	0.9005	0.0866		X
SM184_62.FIN2	4.4827	3.64963	0.639352	1.02	0.24	0.83956	0.0315	X	X
SM184_62.FIN2	4.4247	2.12766	0.38479	0.91	0.2	0.46744	0.021		X
SM184_63.FIN2	1	7.19424	1.75974	0.85	0.23	0.60608	0.174		X
SM184_63.FIN2	7.3177	9.80392	1.24952	0.94	0.16	0.79001	0.0898
SM184_64.FIN2	5.9352	3.861	0.551572	0.98	0.15	0.39338	0.0471
SM184_64.FIN2	2.8931	5.64972	1.02142	0.79	0.2	0.36863	0.0299		X
SM184_65.FIN2	1	4.83092	1.00352	0.84	0.16	0.64459	0.074
SM184_65.FIN2	8.6792	6.0241	0.907243	0.85	0.14	0.89563	0.0465
SM184_66.FIN2	2.7809	23.8095	6.23583	0.91	0.24	0.86697	0.239		X
SM184_66.FIN2	3.7439	11.6279	1.75771	0.84	0.11	0.68449	0.198
SM184_67.FIN2	1.7018	3.81679	0.728396	0.95	0.19	0.73469	0.096
SM184_67.FIN2	5.674	6.94444	0.81983	0.84	0.15	0.91453	0.0598
SM184_68.FIN2	4.0843	2.90698	0.684492	1.09	0.2	0.81603	0.0209	X	X
SM184_68.FIN2	17.076	0.236407	0.0525348	0.931	0.091	0.78299	0.048
SM184_69.FIN2	1.5316	4.52489	1.16705	0.82	0.16	0.51008	0.15
SM184_69.FIN2	2.7799	9.80392	2.21069	0.83	0.18	0.66635	0.1259
SM184_69.FIN2	3.2334	9.09091	1.32231	0.87	0.14	0.8517	0.1132
SM184_70.FIN2	1	3.06749	0.602206	0.98	0.24	-0.43512	0.102	X	X
SM184_70.FIN2	4.2545	2.32019	0.317612	0.78	0.12	0.031532	0.024
SM184_70.FIN2	17.076	0.265252	0.0633228	0.798	0.058	-0.080222	0.047
SM184_71.FIN2	7.1265	4.31034	0.59453	0.82	0.14	0.27186	0.0525							Age for spot run		2σ uncertainty
SM184_72.FIN2	4.765	2.80112	0.353082	0.83	0.1	0.28033	0.144							Age	no fit
SM184_72.FIN2	3.1213	4.80769	0.878328	1.15	0.24	0.84924	0.0504	X	X					Pb0 =
SM184_74.FIN2	4.5738	9.43396	1.33499	0.93	0.2	0.16368	0.287							MSWD =
SM184_74.FIN2	3.7439	6.17284	1.14312	0.92	0.2	0.72257	0.077							n =	14
SM184_75.FIN2	4.1424	5.31915	0.311227	0.82	0.062	0.71486	0.253
SM184_75.FIN2	5.2756	4.78469	0.389185	0.818	0.064	0.40525	0.119
SM184_76.FIN2	4.1424	4.29185	0.607858	0.89	0.14	0.74862	0.118
SM184_76.FIN2	6.1265	2.2779	0.243876	0.741	0.094	0.63588	0.048
SM184_77.FIN2	1.1913	7.5188	2.0917	0.91	0.28	0.69608	0.16		X
SM184_77.FIN2	17.076	0.178571	0.0318878	0.922	0.091	0.60374	0.051
SM184_78.FIN2	4.4817	6.66667	0.888889	0.86	0.14	0.79967	0.13
SM184_79.FIN2	2.1913	1.47059	0.389273	0.76	0.11	-0.030454	0.028
SM184_79.FIN2	17.076	0.181818	0.0363636	0.826	0.045	0.3307	0.045
SM184_80.FIN2	1.7018	1.05263	0.221607	0.741	0.04	-0.11495	0.15
SM184_80.FIN2	17.076	0.232558	0.0594916	0.81	0.053	0.81757	0.051
SM184_81.FIN2	2.5527	0.377358	0.108224	0.82	0.13	0.67967	0.034							Age for spot run		2σ uncertainty
SM184_81.FIN2	17.075	0.154559	0.0138554	0.813	0.024	0.24896	0.08							Age	166	212
SM184_82.FIN2	3.5738	0.18797	0.0215529	0.775	0.049	0.26322	0.0251							Pb0 =	0.822
SM184_83.FIN2	4.8231	0.497512	0.0470285	0.836	0.086	0.41144	0.049							MSWD =	1.6
SM184_84.FIN2	2.4406	0.214592	0.0267089	0.838	0.069	0.23533	0.095							n =	15
SM184_85.FIN2	2.9511	0.918274	0.0792633	0.825	0.05	0.24345	0.4
SM184_85.FIN2	1.3614	2	0.3	0.741	0.074	0.68459	0.1682
SM184_86.FIN2	2.7229	1.06383	0.124491	0.801	0.072	0.49196	0.445
SM184_86.FIN2	17.076	0.35461	0.0653891	0.831	0.028	0.073213	0.127
SM184_86.FIN2	5.9563	1.28205	0.0690335	0.8	0.053	-0.11231	0.128
SM184_87.FIN2	7.5459	0.326797	0.0352429	0.84	0.042	0.59947	0.0258
SM184_88.FIN2	4.3125	0.2079	0.0332813	0.794	0.064	-0.010823	0.0417
SM184_89.FIN2	7.7161	1.40253	0.129827	0.815	0.046	0.34685	0.107
SM184_90.FIN2	2.9511	1.17096	0.10695	0.769	0.087	0.34525	0.41
SM184_90.FIN2	4.9352	0.680272	0.0740432	0.691	0.068	0.30095	0.026

## Sheet: 1912-SM215
Sample number	latitude	longitude	Datum
1912-SM215	33.8815	-114.749	NAD1983 UTM zone 11N
Real sample number	Duration(s)	238U/206Pb	2σ error 238U/206Pb	207Pb/206Pb	2σ error 207Pb/206Pb	Error Correlation 238U/206Pb vs. 207Pb/206Pb	U PPM	Exclusions for 207/206 >1	Exclusions for 207/206err >0.2
SM215_1.FIN2	6.5249	116.279	11.7631	0.685	0.07	0.50779	15.18			Age for entire sample (nothing omitted)		2σ uncertainty		Age for spot run		2σ uncertainty
SM215_1.FIN2	4.5948	107.181	9.41999	0.693	0.042	0.11037	15.43			Age	7.94	1.02		Age	7.8	2.12
SM215_1.FIN2	3.0632	35.8423	3.59708	0.803	0.065	0.7679	2.75			Pb0 =	0.7723	0.0028		Pb0 =	0.7722
SM215_3.FIN2	4.1424	100	15	0.621	0.086	0.84099	5.85			MSWD =	1.6			MSWD =	1.1
SM215_3.FIN2	6.1265	103.95	7.78005	0.669	0.061	0.80603	5.194			n =	166
SM215_3.FIN2	3.9141	29.9401	3.0478	0.787	0.066	0.60316	2.08
SM215_4.FIN2	5.1634	49.7512	2.97022	0.711	0.04	0.83326	6.49
SM215_3.FIN2	6.2966	48.5437	2.82779	0.722	0.036	0.6364	7.21			Age for matrix spots 26-45
SM215_3.FIN2	4.0843	24.3309	1.53918	0.729	0.068	0.50894	2.31			Age	1.53	7.36
SM215_5.FIN2	3.6308	71.6846	3.54569	0.701	0.047	0.69515	20.39			Pb0 =	0.7708
SM215_5.FIN2	5.9563	64.0205	2.82805	0.71	0.028	0.7102	19.44			MSWD =	1.4
SM215_5.FIN2	4.5948	33.557	2.47737	0.757	0.053	0.14898	5.8			n =	41
SM215_7.FIN2	4.4827	5.9453	0.240357	0.76	0.029	0.47898	4.43
SM215_7.FIN2	7.4879	6.41849	0.193626	0.767	0.019	0.73808	4.32			Age for coarse calcite spots 1-25, 46-80
SM215_8.FIN2	4.8231	2.38664	0.153793	0.759	0.035	0.46084	6.31			Age	7.93	1.04
SM215_8.FIN2	5.9563	2.05339	0.0843281	0.779	0.022	0.23827	5.65			Pb0 =	0.7716
SM215_8.FIN2	4.765	3.14465	0.484554	0.769	0.027	0.26205	1.87			MSWD =	1.7
SM215_9.FIN2	6.8652	7.90514	0.312456	0.797	0.041	0.6465	7.57			n =	125
SM215_9.FIN2	9.1897	8.05153	0.175033	0.786	0.019	0.5788	5.47
SM215_10.FIN2	3.802	6.74309	0.427411	0.811	0.051	0.67069	7.14
SM215_10.FIN2	6.8072	6.64894	0.269671	0.774	0.042	0.67052	6.36
SM215_10.FIN2	4.2545	7.28332	0.307671	0.747	0.024	0.33734	3
SM215_11.FIN2	4.6529	8.97666	0.402902	0.747	0.039	0.66725	6.21
SM215_11.FIN2	5.2756	7.86782	0.340464	0.751	0.033	0.6107	6.65
SM215_11.FIN2	3.5738	6.7981	0.305013	0.749	0.033	0.66709	2.42
SM215_14.FIN2	3.802	6.26959	0.326255	0.766	0.04	0.70308	12.71
SM215_14.FIN2	6.1265	6.16523	0.174846	0.77	0.022	0.4615	11.77
SM215_14.FIN2	2.3825	5.07614	0.46381	0.781	0.049	0.51029	1.45
SM215_14.FIN2	3.4606	2.74725	0.158495	0.737	0.038	0.58836	12.3
SM215_14.FIN2	4.0843	3.0303	0.119376	0.757	0.02	0.70408	11.61
SM215_14.FIN2	5.4457	3.46021	0.263407	0.768	0.019	0.44913	3.71
SM215_16.FIN2	4.8231	31.5457	2.08978	0.751	0.054	0.73496	6.755							Age for spot run		2σ uncertainty
SM215_16.FIN2	7.6581	24.6914	1.58512	0.77	0.028	0.43832	6.32							Age	3.65	5.94
SM215_16.FIN2	3.9141	13.5501	0.936392	0.768	0.047	0.67389	1.87							Pb0 =	0.7716
SM215_17.FIN2	4.8231	28.169	1.50764	0.785	0.056	0.43959	8.13							MSWD =	1.5
SM215_17.FIN2	7.4879	28.169	0.952192	0.771	0.025	0.28964	8.3
SM215_19.FIN2	3.802	31.746	2.41874	0.719	0.056	0.81619	11.03
SM215_19.FIN2	7.3177	22.779	1.71232	0.781	0.023	0.2304	7.34
SM215_20.FIN2	3.9722	8.6881	0.513285	0.802	0.05	0.56779	9.5
SM215_20.FIN2	8.509	7.86782	0.272371	0.786	0.027	0.65095	8.58
SM215_21.FIN2	2.7809	2.93255	0.240796	0.774	0.058	0.57966	10.09
SM215_21.FIN2	8.1686	2.24215	0.0904905	0.785	0.026	0.62679	8.33
SM215_22.FIN2	4.9933	4.71698	0.311499	0.754	0.048	0.78771	5.58
SM215_22.FIN2	7.1475	3.92157	0.215302	0.758	0.019	0.29159	4.72
SM215_22.FIN2	3.0632	4.92611	0.266932	0.732	0.038	0.62959	0.89
SM215_23.FIN2	3.802	15.3139	1.03187	0.695	0.045	0.91461	8.13
SM215_23.FIN2	6.1265	14.6843	0.517508	0.761	0.028	0.7587	8.63
SM215_23.FIN2	4.9352	12.5	0.71875	0.778	0.033	0.54325	3.2
SM215_24.FIN2	4.6519	29.4118	0.865052	0.744	0.03	0.64086	19.37
SM215_24.FIN2	6.9774	25.8398	0.934773	0.754	0.022	-0.029203	14.4
SM215_25.FIN2	5.1634	29.9401	1.61354	0.743	0.037	0.61008	13.84
SM215_25.FIN2	6.1265	24.6914	1.15836	0.774	0.031	0.25302	13.31
SM215_25.FIN2	4.4247	17.6678	1.15497	0.738	0.047	0.52279	2.36
SM215_26.FIN2	6.1845	2.43902	0.172516	0.769	0.045	0.65296	0.886							Age for spot run		2σ uncertainty
SM215_26.FIN2	3.5738	3.04878	0.130131	0.753	0.028	0.58016	0.91							Age	no fit
SM215_27.FIN2	2.6107	3.02115	0.155165	0.788	0.042	0.48713	1.62							Pb0 =
SM215_27.FIN2	4.9352	2.6178	0.150763	0.777	0.034	0.57723	0.977							MSWD =
SM215_28.FIN2	4.1414	3.84615	0.221893	0.767	0.044	0.38293	1.229
SM215_28.FIN2	5.2756	3.01205	0.226811	0.779	0.043	0.3233	0.94
SM215_29.FIN2	3.9722	4.34783	0.396975	0.808	0.036	0.63277	1.71
SM215_29.FIN2	10.381	4.01606	0.177417	0.79	0.029	0.096336	1.13
SM215_30.FIN2	7.5449	2.87356	0.173405	0.749	0.029	0.64757	1.174
SM215_30.FIN2	3.9141	4.80769	0.41605	0.778	0.052	0.6581	0.487
SM215_31.FIN2	7.0354	1.16279	0.0621958	0.769	0.036	0.70259	0.493
SM215_31.FIN2	6.9774	2.89855	0.26045	0.791	0.036	0.28197	0.488
SM215_32.FIN2	3.9722	4.90196	0.480584	0.81	0.05	-0.11788	1.95
SM215_32.FIN2	7.4879	10.582	0.772655	0.77	0.034	0.40558	3.45
SM215_33.FIN2	2.7809	7.24638	0.73514	0.803	0.069	0.46561	1.897
SM215_33.FIN2	3.2334	6.80272	0.555324	0.78	0.042	0.46665	2.39
SM215_34.FIN2	3.6318	2.86533	0.164202	0.741	0.033	0.41971	1.187
SM215_34.FIN2	9.0195	3.93701	0.1705	0.797	0.024	0.35567	1.085
SM215_35.FIN2	3.6318	8.40336	0.847398	0.82	0.052	0.72403	5.73
SM215_35.FIN2	8.6792	10.7181	0.850097	0.757	0.019	0.37966	4.29
SM215_36.FIN2	4.9933	4.16667	0.347222	0.783	0.052	0.57632	1.66							Age for spot run		2σ uncertainty
SM215_36.FIN2	9.1897	6.6269	0.430376	0.754	0.025	0.14277	2.13							Age	2.63	6.32
SM215_37.FIN2	4.3125	3.14465	0.177999	0.824	0.06	0.60841	1.19							Pb0 =	0.767
SM215_37.FIN2	8.1686	2.7248	0.118792	0.752	0.019	0.38717	1.24							MSWD =	1.2
SM215_38.FIN2	4.3125	13.9082	1.00588	0.783	0.051	0.66413	5.32
SM215_38.FIN2	7.3177	13.986	0.801995	0.792	0.034	0.14288	3.54
SM215_39.FIN2	5.5038	15.4559	1.02721	0.754	0.042	0.49783	3.04
SM215_39.FIN2	10.551	20.8768	1.00244	0.76	0.028	0.40653	3
SM215_40.FIN2	6.0143	1.98807	0.126478	0.761	0.066	0.6264	0.745
SM215_40.FIN2	6.1265	5.52486	1.06834	0.79	0.042	0.43506	1.44
SM215_41.FIN2	2.4406	2.03252	0.227213	0.84	0.11	0.75048	1.607
SM215_41.FIN2	4.2545	1.48809	0.0952204	0.799	0.082	0.68649	1.711
SM215_41.FIN2	8.1686	2.95858	0.227583	0.766	0.019	0.33304	2.297
SM215_42.FIN2	3.802	2.22222	0.138272	0.771	0.059	0.71704	1.007
SM215_42.FIN2	6.9774	2.92398	0.119695	0.761	0.035	0.60149	1.058
SM215_43.FIN2	5.674	2.78552	0.147423	0.808	0.042	0.64865	1.769
SM215_43.FIN2	9.7002	2.2173	0.0983279	0.769	0.026	0.56336	1.01
SM215_44.FIN2	6.5249	3.15457	0.189075	0.759	0.032	0.55588	1.207
SM215_44.FIN2	8.8493	2.48756	0.0928195	0.754	0.015	0.072425	1.159
SM215_45.FIN2	5.5038	13.587	0.996869	0.774	0.056	0.45334	3.72
SM215_45.FIN2	5.4457	14.556	1.44077	0.771	0.035	0.42901	4.35
SM215_46.FIN2	5.674	3.37838	0.125548	0.799	0.038	0.47371	6.4							Age for spot run		2σ uncertainty
SM215_46.FIN2	7.1475	3.1746	0.0856639	0.756	0.019	0.50635	3.63							Age	8.43	1.64
SM215_47.FIN2	4.3115	3.19489	0.244976	0.764	0.055	0.82178	8.12							Pb0 =	0.7698
SM215_47.FIN2	4.2545	2.88184	0.0913553	0.74	0.023	0.58607	6.87							MSWD =	2.5
SM215_48.FIN2	3.9722	1.86567	0.0835375	0.77	0.037	0.53259	7.42
SM215_48.FIN2	8.6792	2.09644	0.0615306	0.761	0.02	0.54105	5.75
SM215_49.FIN2	4.3125	4	0.24	0.729	0.045	0.6173	4.17
SM215_49.FIN2	3.7439	5.10204	0.286339	0.784	0.049	0.53326	3.39
SM215_49.FIN2	5.7861	4.56621	0.271054	0.746	0.03	0.69664	1
SM215_50.FIN2	3.802	4.25532	0.362155	0.768	0.059	0.81703	5.59
SM215_50.FIN2	10.551	5.17866	0.160911	0.784	0.016	0.47744	5.15
SM215_51.FIN2	5.5038	4.3573	0.165179	0.804	0.028	0.6159	4.24
SM215_51.FIN2	5.9563	4.10509	0.136499	0.779	0.023	0.30686	3.54
SM215_52.FIN2	3.6308	40.4858	2.13083	0.698	0.034	0.20715	16.7
SM215_52.FIN2	8.1686	41.7362	1.61998	0.735	0.025	0.47804	14.4
SM215_53.FIN2	3.7439	55.2486	3.66289	0.705	0.06	0.68156	6.67
SM215_53.FIN2	7.1475	44.6429	2.39158	0.664	0.031	0.40493	6.33
SM215_53.FIN2	4.5948	21.9298	1.39466	0.747	0.076	0.7933	2.14
SM215_54.FIN2	4.8231	227.79	22.8309	0.63	0.1	0.42266	9.42
SM215_54.FIN2	6.9774	206.186	22.1065	0.583	0.055	-0.028133	10.07
SM215_55.FIN2	4.6529	179.533	19.3393	0.629	0.069	0.47695	9.59
SM215_55.FIN2	9.1897	114.942	21.1389	0.664	0.047	-0.095786	9.13
SM215_56.FIN2	1.872	1.52439	0.109217	0.749	0.057	0.13576	1.83							Age for spot run		2σ uncertainty
SM215_56.FIN2	7.7161	0.860585	0.0518425	0.777	0.022	0.22083	0.76							Age	7.26	1.98
SM215_57.FIN2	1.5105	0.408163	0.0383174	0.784	0.057	0.5377	0.604							Pb0 =	0.7627
SM215_58.FIN2	4.6529	5.40541	0.321402	0.752	0.042	0.77427	4.34							MSWD =	1.7
SM215_58.FIN2	8.6792	5.44959	0.1574	0.753	0.025	0.56114	4.58
SM215_59.FIN2	5.1634	5.07614	0.309207	0.775	0.041	0.71536	4.7
SM215_59.FIN2	8.6792	4.34216	0.133866	0.765	0.017	0.57277	5.75
SM215_60.FIN2	3.802	3.96825	0.188965	0.769	0.038	0.24528	7.99
SM215_60.FIN2	10.381	4.84731	0.117482	0.761	0.013	0.62684	7.25
SM215_61.FIN2	3.9722	5.55556	0.308642	0.806	0.05	0.66025	5.78
SM215_61.FIN2	8.509	5.54324	0.141346	0.77	0.018	0.73927	5.95
SM215_62.FIN2	3.1203	5.31915	0.311227	0.809	0.065	0.71052	8.34
SM215_62.FIN2	10.381	5.09165	0.106292	0.757	0.017	0.43034	8.31
SM215_63.FIN2	2.6107	31.9489	2.24561	0.739	0.037	0.39443	18.34
SM215_63.FIN2	7.6581	21.0084	0.970977	0.734	0.014	0.37794	19.37
SM215_63.FIN2	4.0843	20	1.32	0.76	0.036	0.31731	5.2
SM215_64.FIN2	4.3125	12.9032	1.2154	0.778	0.057	0.94157	10
SM215_64.FIN2	9.7002	15.625	0.65918	0.736	0.02	0.61028	9.12
SM215_65.FIN2	4.1414	22.7273	1.70454	0.732	0.057	0.70452	3.62
SM215_65.FIN2	11.062	18.018	0.519438	0.737	0.027	0.45629	3.66
SM215_66.FIN2	5.1624	56.3063	2.3461	0.675	0.034	0.50315	7.81
SM215_66.FIN2	7.9984	54.5851	2.74118	0.715	0.035	0.64859	8.46
SM215_67.FIN2	4.8231	120.482	9.29017	0.672	0.057	0.67015	10.58
SM215_67.FIN2	9.1897	134.771	7.08364	0.693	0.036	-0.13567	10.97
SM215_68.FIN2	4.4827	21.5054	1.52619	0.68	0.041	0.68822	7.23
SM215_68.FIN2	7.6581	22.6244	1.02373	0.719	0.03	0.79699	6.85
SM215_69.FIN2	3.801	3.87597	0.270416	0.86	0.1	0.73207	9.87							Age for spot run		2σ uncertainty
SM215_69.FIN2	5.7861	3.67782	0.120385	0.784	0.019	0.29701	9.74							Age	14.95	8.54
SM215_70.FIN2	3.6308	3.96825	0.283447	0.739	0.052	0.82924	12.32							Pb0 =	0.7835
SM215_70.FIN2	8.1686	3.94633	0.0934411	0.767	0.014	0.50756	9.27							MSWD =	1.3
SM215_71.FIN2	3.802	4.83092	0.280053	0.811	0.052	0.69659	8.79							n =
SM215_71.FIN2	8.3388	4.04531	0.122734	0.77	0.017	0.40761	7.85
SM215_72.FIN2	4.6529	4.03226	0.276405	0.813	0.046	0.34102	2.58
SM215_72.FIN2	5.9563	3.52113	0.123983	0.789	0.024	0.49467	2.19
SM215_73.FIN2	4.1424	9.5511	0.629442	0.76	0.042	0.73059	10.54
SM215_73.FIN2	7.3177	8.7108	0.295924	0.79	0.027	0.40492	9.05
SM215_74.FIN2	4.4827	13.624	0.649645	0.777	0.04	0.65356	9.45
SM215_74.FIN2	6.8072	16.2602	0.528786	0.763	0.021	0.59612	9.93
SM215_75.FIN2	3.9722	16.9779	0.74945	0.778	0.041	0.47629	7.34
SM215_75.FIN2	7.8283	13.947	0.700268	0.758	0.017	0.57155	7.33
SM215_76.FIN2	3.6308	7.19424	0.621086	0.772	0.057	0.75015	6.71
SM215_76.FIN2	9.7002	10.4493	0.491347	0.745	0.018	0.23387	7.01
SM215_77.FIN2	3.9722	17.8571	1.21174	0.749	0.054	0.70208	4.82
SM215_77.FIN2	5.1054	12.0337	0.825416	0.765	0.039	0.54278	3.68
SM215_77.FIN2	3.0632	14.3885	0.7246	0.767	0.056	-0.42125	1.33
SM215_78.FIN2	3.4616	10.4384	1.00244	0.765	0.09	0.56248	2.66
SM215_78.FIN2	6.2966	15.0602	0.680433	0.768	0.04	0.54462	4.29
SM215_79.FIN2	3.9722	23.8095	1.02041	0.712	0.06	0.61814	6.19
SM215_79.FIN2	3.4036	24.2718	2.17975	0.768	0.045	0.56093	5.57
SM215_79.FIN2	5.1054	24.6305	1.94132	0.717	0.037	0.52628	2.73
